# Supplementary material for: Computational study of oxygen adsorption in metal–organic frameworks with exposed cation sites: effect of framework metal ions
Source: Royal Society of Chemistry journal article supplement (doi:10.1039/c5ra04791a), 2015-01-01
Supplement: c5ra04791a1.pdf [file c5ra04791a1.pdf]

## Supplementary Information:

### Computational study of oxygen adsorption in metal-organic frameworks with exposed cation sites: Effect of framework metal ions

*Yong Wang,<sup>a</sup> Jiangfeng Yang,<sup>a</sup> Zhengjie Li,<sup>b</sup> Zhuoming Zhang,<sup>a</sup> Jinping Li,<sup>\*a</sup>*

*Qingyuan Yang,<sup>\*b</sup> and Chongli Zhong<sup>b</sup>*

*<sup>a</sup>Research Institute of Special Chemicals, Taiyuan University of Technology, Taiyuan  
030024, Shanxi, China*

*<sup>b</sup>State Key Laboratory of Organic-Inorganic Composites, Beijing University of  
Chemical Technology, Beijing 100029, China*

*E-mail: [jpli211@hotmail.com](mailto:jpli211@hotmail.com), [qyyang@mail.buct.edu.cn](mailto:qyyang@mail.buct.edu.cn)*

## 1. Dispersion Parameters

In the DFT-D method,<sup>1</sup> a dispersion contribution ( $E_{\text{disp}}$ ) is added to the conventional Kohn-Sham DFT energy ( $E_{\text{KS-DFT}}$ ), leading to a dispersion-corrected total energy as given by

$$E_{\text{DFT-D}} = E_{\text{KS-DFT}} + E_{\text{disp}} \quad (1)$$

where  $E_{\text{disp}}$  is given by

$$E_{\text{disp}} = -S_6 \sum_{i=1}^{N_{\text{at}}-1} \sum_{j=i+1}^{N_{\text{at}}} \frac{C_6^{ij}}{R_{ij}^6} f_{\text{dmp}}(R_{ij}) \quad (2)$$

Here,  $N_{\text{at}}$  is the number of atoms in the system,  $C_6^{ij}$  is the dispersion coefficient for atom pair  $ij$ ,  $S_6$  is a global scaling factor that only depends on the density functional (DF) used, and  $R_{ij}$  is an interatomic distance. The damping function  $f_{\text{dmp}}$  is given by:

$$f_{\text{dmp}}(R_{ij}) = \frac{1}{1 + e^{-d(R_{ij}/R_r - 1)}} \quad (3)$$

where  $R_r$  is the sum of atomic vdW radii. The atomic  $C_6$  coefficients and vdW radii ( $R_0$ ) used in this work were taken from the literature,<sup>1</sup> as given in Table S1. Because PBE functional was used in our calculations,  $S_6$  and the damping parameter  $d$  were taken 0.75 and 20, respectively.

**Table S1.** Parameters of  $C_6$  ( $\text{J nm}^6 \text{mol}^{-1}$ ) and  $R_0$  ( $\text{\AA}$ ) used in this work

| Element | $C_6$ (in $\text{J nm}^6 \text{mol}^{-1}$ ) | $R_0$ (in $\text{\AA}$ ) |
|---------|---------------------------------------------|--------------------------|
| H       | 0.14                                        | 1.001                    |
| C       | 1.75                                        | 1.452                    |
| O       | 0.70                                        | 1.342                    |
| N       | 1.23                                        | 1.397                    |
| Cr      | 10.80                                       | 1.562                    |
| Mn      | 10.80                                       | 1.562                    |
| Fe      | 10.80                                       | 1.562                    |
| Co      | 10.80                                       | 1.562                    |
| Ni      | 10.80                                       | 1.562                    |
| Cu      | 10.80                                       | 1.562                    |

## 2. Interaction energies of O<sub>2</sub> and N<sub>2</sub> with M<sub>3</sub>(BTC)<sub>2</sub>

**Table S2.** Comparison of the interaction energies of O<sub>2</sub> and N<sub>2</sub> molecules with M<sub>3</sub>(BTC)<sub>2</sub> (units: kJ mol<sup>-1</sup>).

|                | Cr <sub>3</sub> (BTC) <sub>2</sub> | Mn <sub>3</sub> (BTC) <sub>2</sub> | Fe <sub>3</sub> (BTC) <sub>2</sub> | Ni <sub>3</sub> (BTC) <sub>2</sub> | Co <sub>3</sub> (BTC) <sub>2</sub> | Cu <sub>3</sub> (BTC) <sub>2</sub> |
|----------------|------------------------------------|------------------------------------|------------------------------------|------------------------------------|------------------------------------|------------------------------------|
| O <sub>2</sub> | -63.5                              | -85.3                              | -56.0                              | -45.2                              | -40.5                              | -8.1                               |
| N <sub>2</sub> | -22.2                              | -50.1                              | -66.2                              | -34.0                              | -44.6                              | -18.9                              |

### References:

- 1 S. Grimme, *J. Comput. Chem.*, 2006, **27**, 1787.
